# Supplementary material
Source: publisher figshare collection journal article supplement (https://karger.figshare.com/articles/dataset/_/4028799)

Figure S1

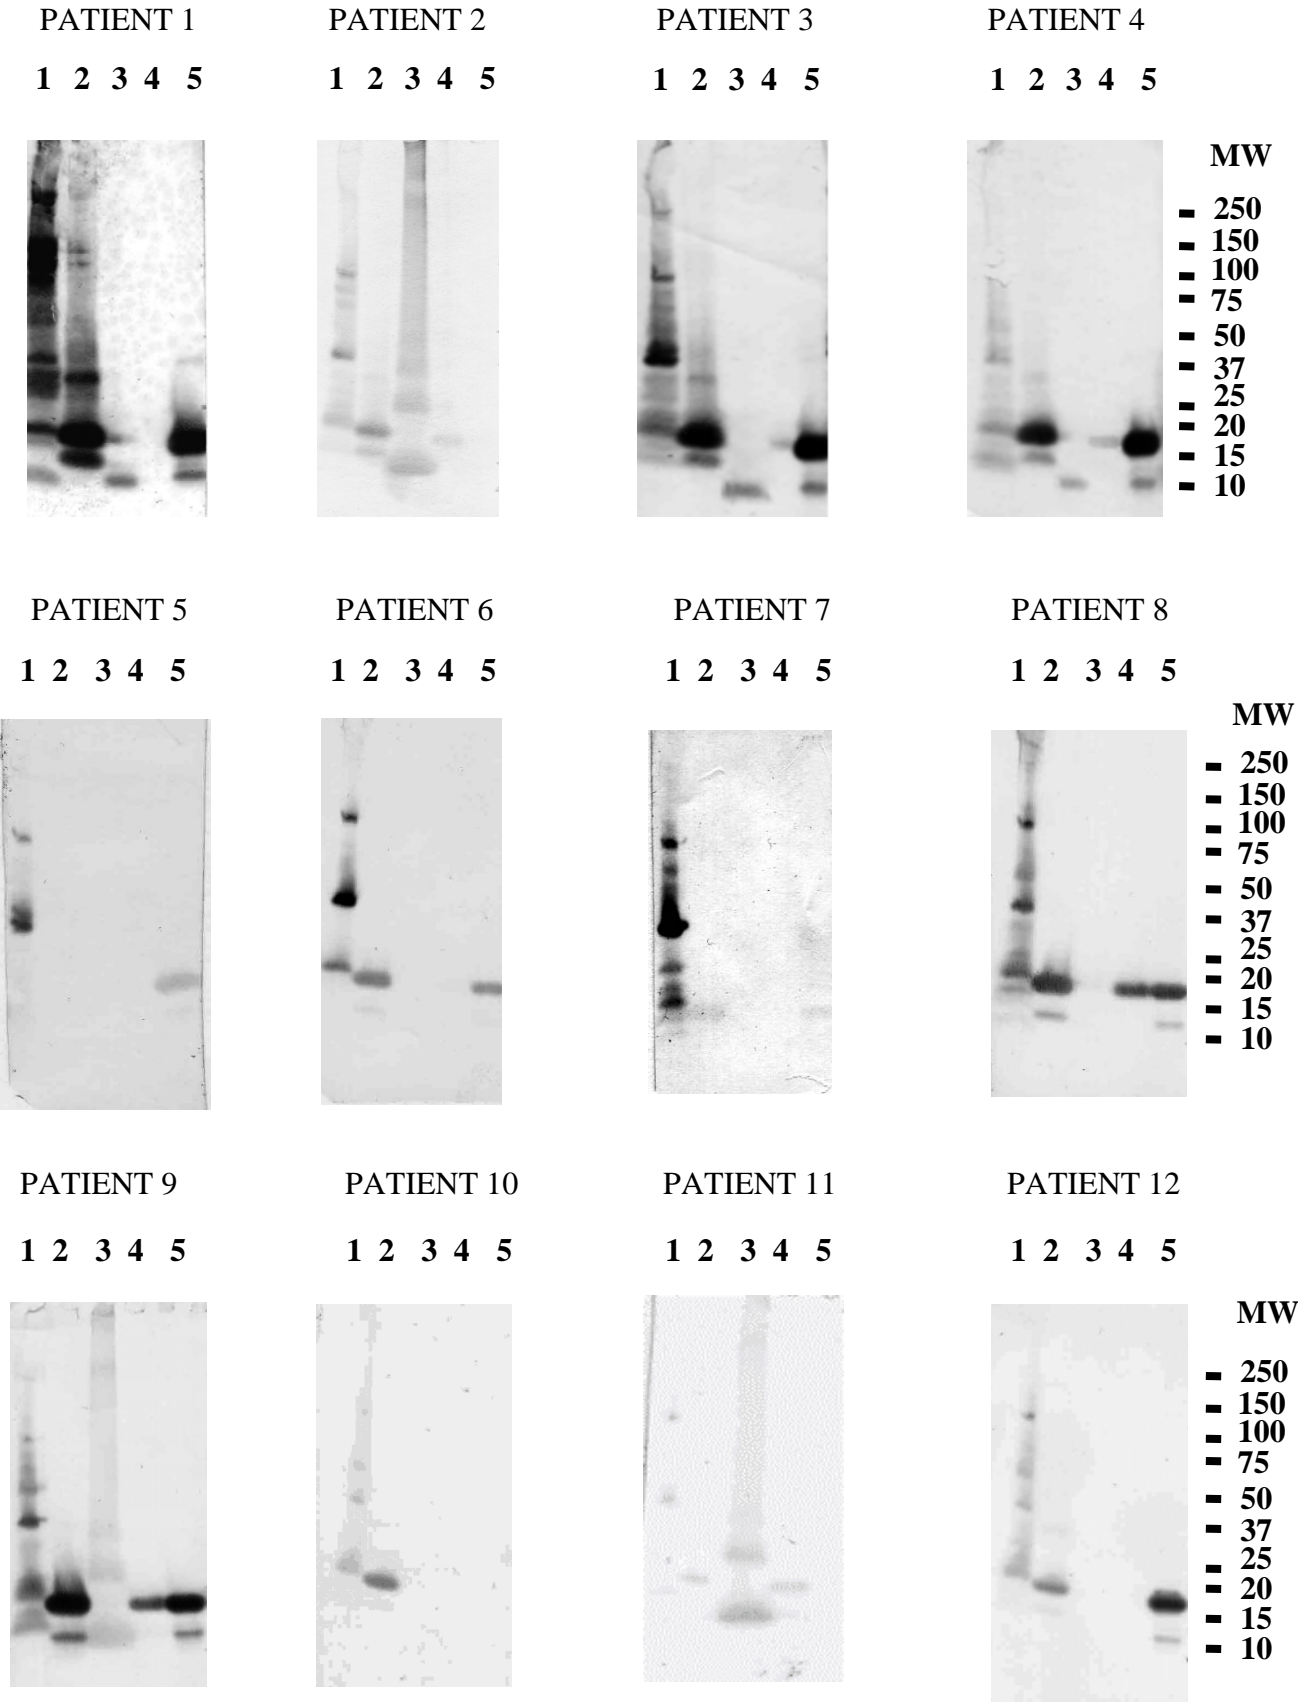

PATIENT 13

1 2 3 4 5

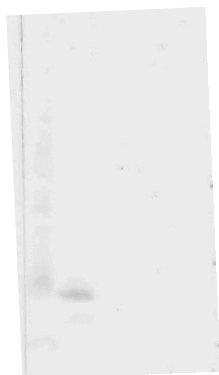

PATIENT 14

1 2 3 4 5

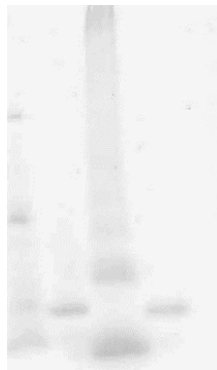

PATIENT 15

1 2 3 4 5

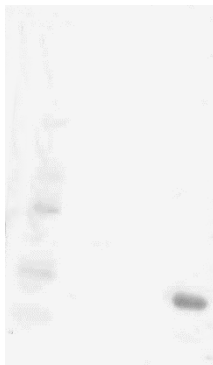

PATIENT 16

1 2 3 4 5

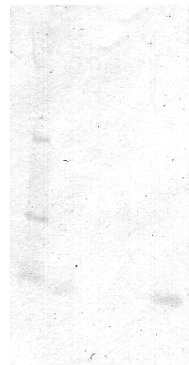

MW

- 250
- 150
- 100
- 75
- 50
- 37
- 25
- 20
- 15
- 10

PATIENT 17

1 2 3 4 5

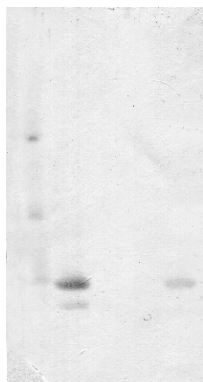

PATIENT 18

1 2 3 4 5

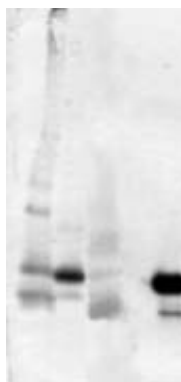

PATIENT 19

1 2 3 4 5

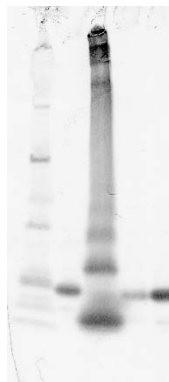

PATIENT 20

1 2 3 4 5

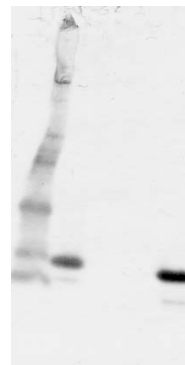

MW

- 250
- 150
- 100
- 75
- 50
- 37
- 25
- 20
- 15
- 10

PATIENT 21

1 2 3 4 5

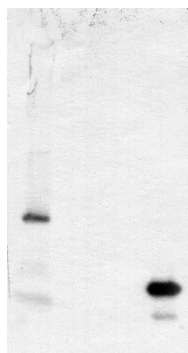

PATIENT 22

1 2 3 4 5

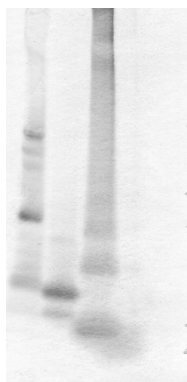

PATIENT 23

1 2 3 4 5

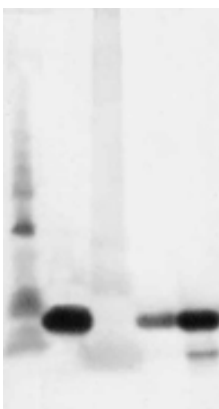

PATIENT 24

1 2 3 4 5

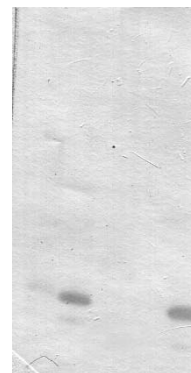

MW

- 250
- 150
- 100
- 75
- 50
- 37
- 25
- 20
- 15
- 10

PATIENT 25

1 2 3 4 5

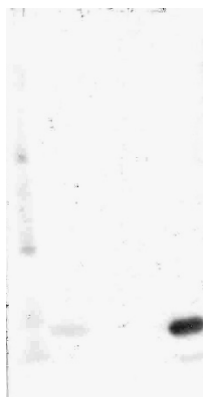

PATIENT 26

1 2 3 4 5

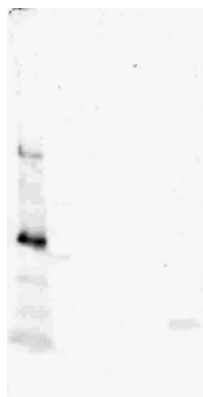

PATIENT 27

1 2 3 4 5

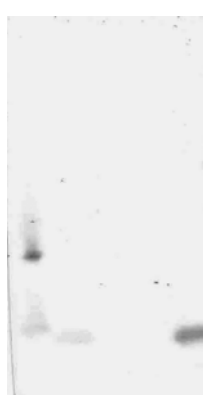

PATIENT 28

1 2 3 4 5

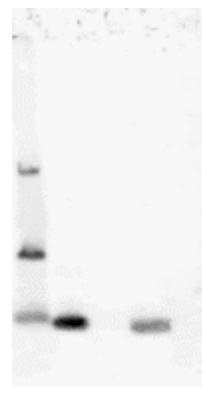

MW

- 250  
 - 150  
 - 100  
 - 75  
 - 50  
 - 37  
 - 25  
 - 20  
 - 15  
 - 10

PATIENT 29

1 2 3 4 5

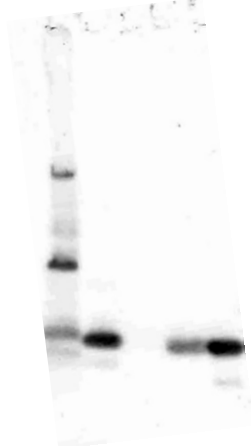

PATIENT 30

1 2 3 4 5

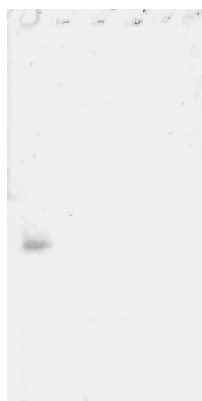

PATIENT 31

1 2 3 4 5

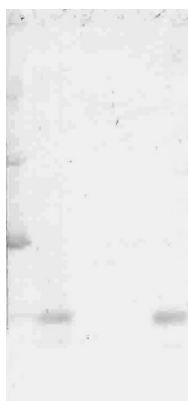

PATIENT 32

1 2 3 4 5

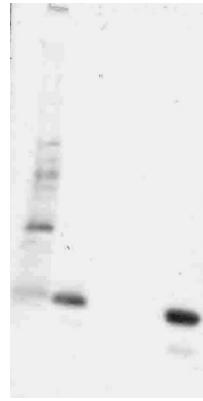

MW

- 250  
 - 150  
 - 100  
 - 75  
 - 50  
 - 37  
 - 25  
 - 20  
 - 15  
 - 10

PATIENT 33

1 2 3 4 5

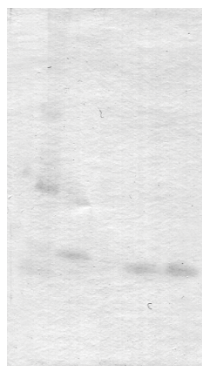

PATIENT 34

1 2 3 4 5

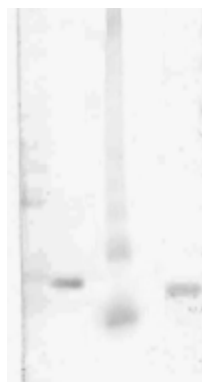

PATIENT 35

1 2 3 4 5

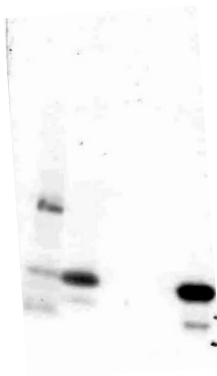

PATIENT 36

1 2 3 4 5

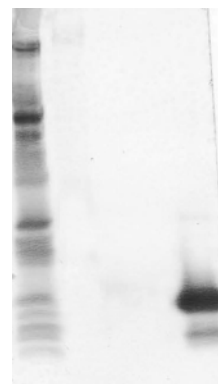

MW

- 250  
 - 150  
 - 100  
 - 75  
 - 50  
 - 37  
 - 25  
 - 20  
 - 15  
 - 10

PATIENT 37

1 2 3 4 5

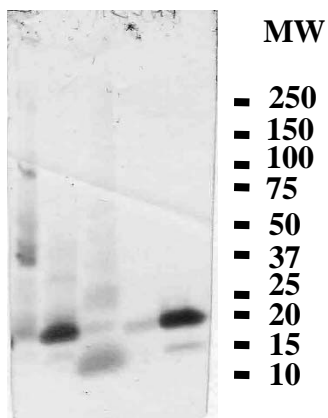

Supplement: Supplementary file 1 [file 1]
